# Supplementary material for: Astrocytic response mediated by the CLU risk allele inhibits OPC proliferation and myelination in a human iPSC model
Source: PubMed Central journal article supplement (PMC10510531; doi:10.1016/j.celrep.2023.112841), 2023-07-25
Supplement: NIHMS1928234-supplement-1.pdf [file NIHMS1928234-supplement-1.pdf]

**Cell Reports, Volume 42**

**Supplemental information**

**Astrocytic response mediated by the CLU  
risk allele inhibits OPC proliferation  
and myelination in a human iPSC model**

**Zhenqing Liu, Jianfei Chao, Cheng Wang, Guihua Sun, Daniel Roeth, Wei Liu, Xianwei Chen, Li Li, E Tian, Lizhao Feng, Hayk Davtyan, Mathew Blurton-Jones, Markus Kalkum, and Yanhong Shi**

Cell Reports, Volume ■ ■

## Supplemental information

### **Astrocytic response mediated by the CLU risk allele inhibits OPC proliferation and myelination in a human iPSC model**

**Zhenqing Liu, Jianfei Chao, Cheng Wang, Guihua Sun, Daniel Roeth, Wei Liu, Xianwei Chen, Li Li, E. Tian, Lizhao Feng, Hayk Davtyan, Mathew Blurton-Jones, Markus Kalkum, and Yanhong Shi**

## Supplementary Figures and Legends

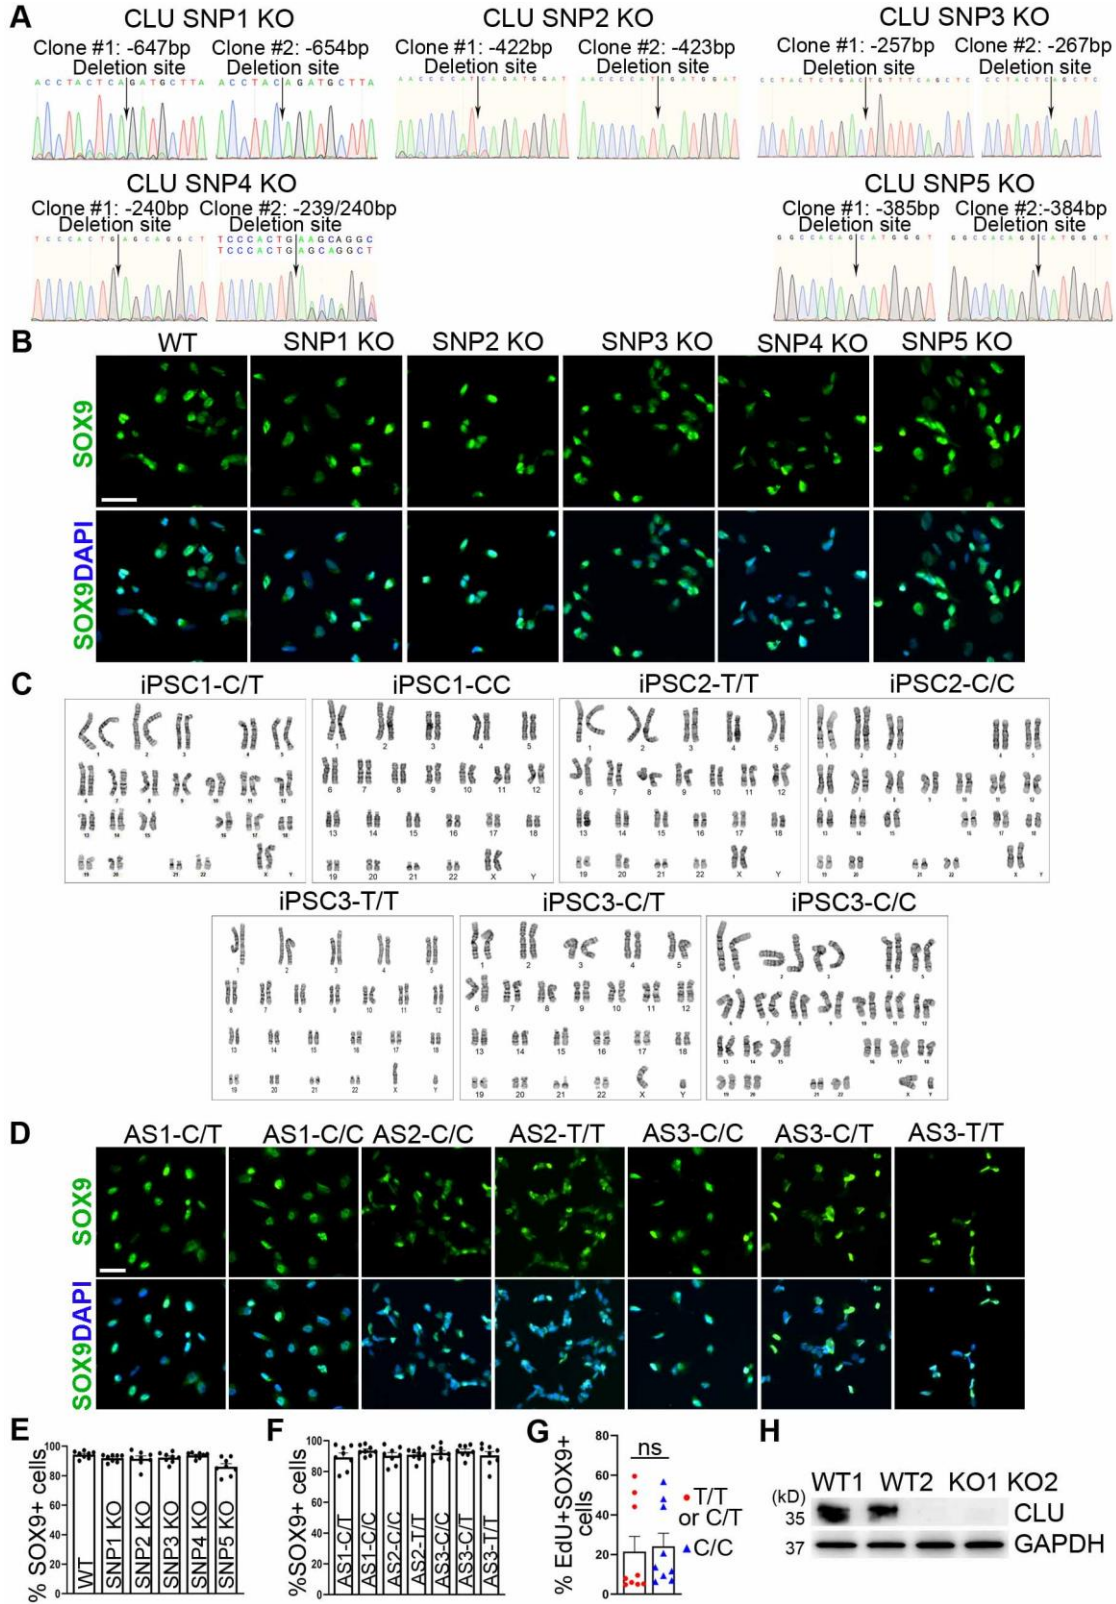

**Fig. S1 Characterization of CLU SNP KO or SNP1 C/C, C/T or T/T astrocytes, related to Fig 1, 2.**

(A) DNA sequence showing deletion of the CLU SNP1, SNP2, SNP3, SNP4 and SNP5 region in iPSCs.

(B) The WT and CLU SNP KO astrocytes express the astrocyte marker SOX9 as revealed by immunostaining.

(C) The CLU C/C, C/T, or T/T iPSCs exhibit normal karyotype as revealed by G-banding karyotyping.

(D) The CLU C/C, C/T, or T/T astrocytes expressed the astrocyte marker SOX9 as revealed by immunostaining.

(E) The purity of the WT or SNP KO astrocytes determined by the percentage of SOX9<sup>+</sup> cells (% SOX9<sup>+</sup> cells) based on staining images.

(F) The purity of the CLU C/C, C/T, or T/T astrocytes determined by the percentage of SOX9<sup>+</sup> cells (% SOX9<sup>+</sup> cells) based on staining images.

(G) T/T or C/T and C/C astrocyte proliferation determined by the percentage of EdU<sup>+</sup>SOX9<sup>+</sup> cells.

(H) The specificity of the CLU antibody is shown by Western blot using wildtype (WT) and CLU knockout (KO) iPSC-derived brain organoids. WT1 and WT2 represent 2 organoids from the WT group and KO1 and KO2 represent 2 organoids from the KO group.

Error bars are SEM of the mean. p values are indicated in the graphs, analyzed by two-tailed student's t-test. ns: not statistically significant ( $p > 0.05$ ). n=8 images per group for (E, F), n=9 independent experiments for (G). Scale bar: 50  $\mu$ m for (B, D).

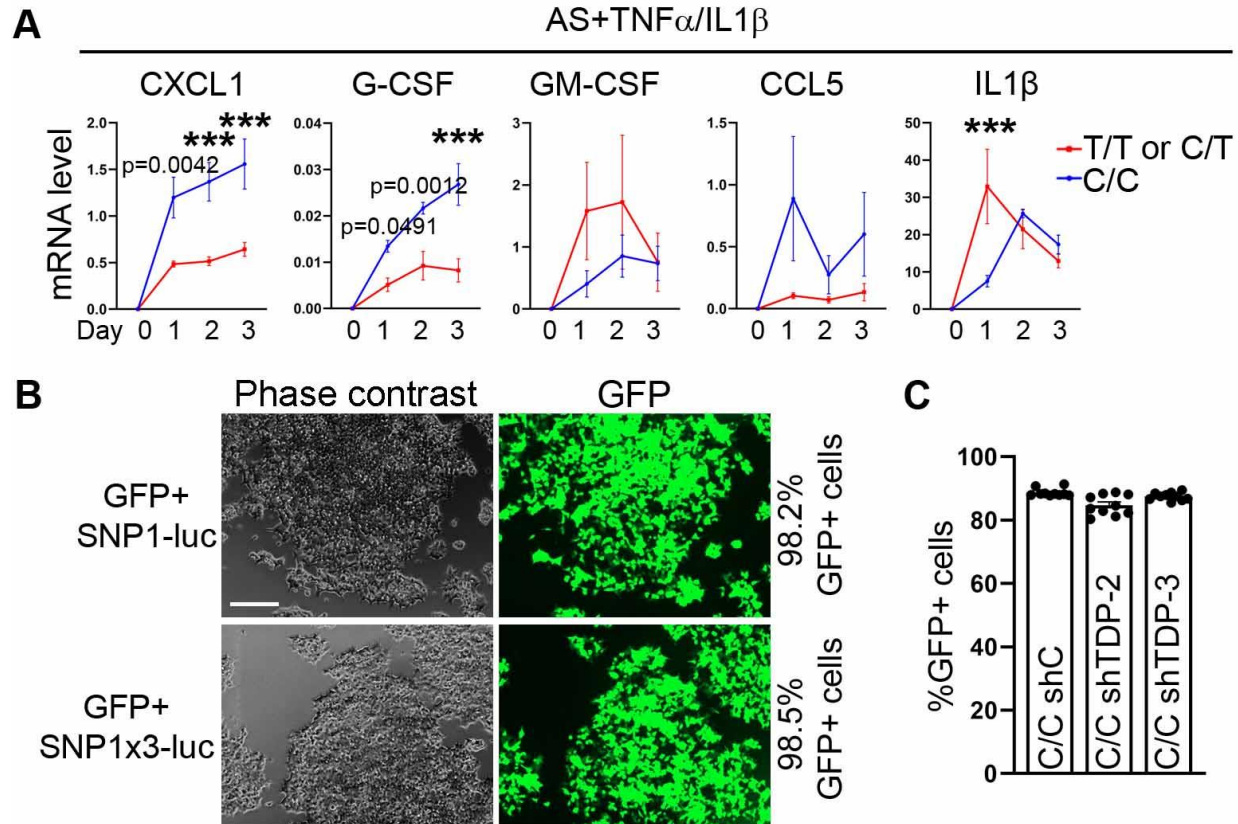

**Fig. S2 The induction of chemokines and cytokines in astrocytes treated with TNF $\alpha$ /IL1 $\beta$ , related to Fig 2, 3.**

(A) Induction of chemokines and cytokines (CXCL1, G-CSF, GM-CSF, CCL5, IL1 $\beta$ ) at mRNA level in C/C, T/T or C/T astrocytes treated with TNF $\alpha$ /IL1 $\beta$  for 0, 1, 2, and 3 days as revealed by qRT-PCR.

(B) Control GFP transfection efficiency for TDP43 overexpression (OE) in HEK293T cells.

(C) Transduction efficiency for TDP43 knockdown (KD) in iPSC-derived C/C astrocytes.

Error bars are SEM of the mean. \*\*\* $p < 0.001$ , analyzed by two-way ANOVA followed by Bonferroni's multiple comparisons test. 2 isogenic pairs were used, with 2 iPSC lines per group.  $n=8$  independent experiments for (A),  $n=10$  images for each condition for (C). Scale bar: 200  $\mu\text{m}$  for (B).

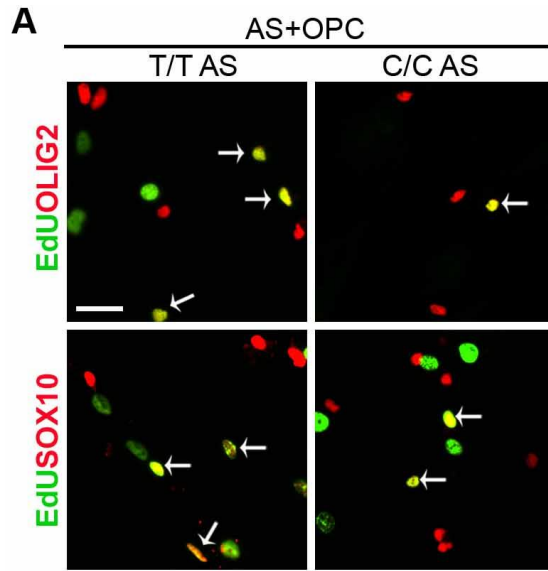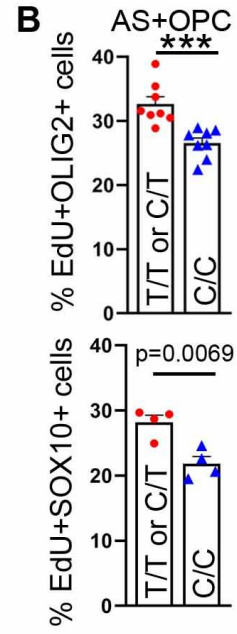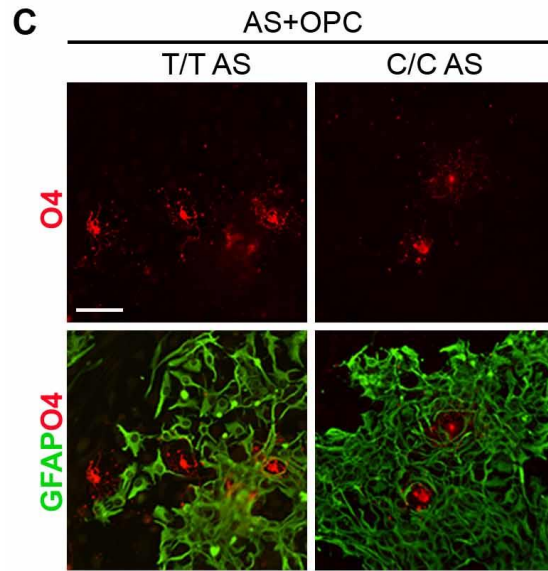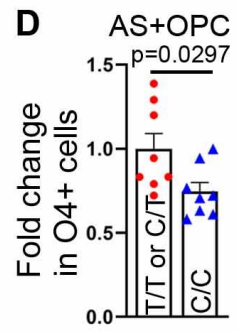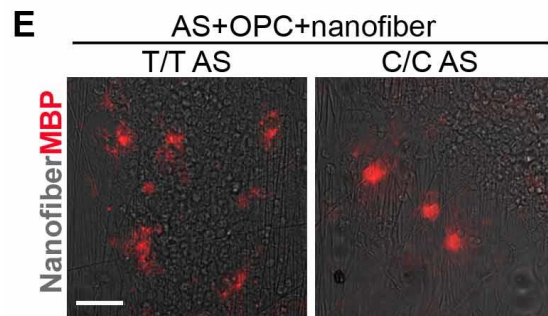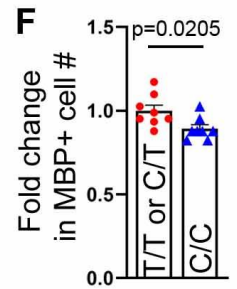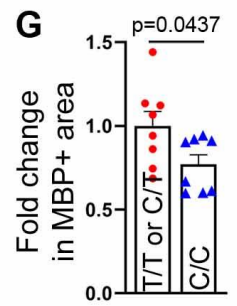

**Fig. S3 C/C astrocytes induce mild inhibition of OPC proliferation and myelination in the absence of cytokine treatment, related to Fig 4.**

(A, B) C/C astrocytes (AS) induce mild inhibition of OPC proliferation in the absence of cytokine treatment, compared to T/T or C/T astrocytes. C/C, T/T or C/T astrocytes were co-cultured with OPCs in the absence of cytokine treatment. The proliferation of OPC was evaluated by EdU labeling 1 day after co-culture. Arrows point to the EdU<sup>+</sup>OLIG2<sup>+</sup> or EdU<sup>+</sup>SOX10<sup>+</sup> proliferative OPCs. The percentage of EdU<sup>+</sup>OLIG2<sup>+</sup> cells and EdU<sup>+</sup>SOX10<sup>+</sup> cells in C/C, T/T or C/T AS is shown in panel B.

(C, D) Co-culture with C/C astrocytes leads to mildly reduced O4<sup>+</sup> cell number (#) in the absence of cytokine treatment. C/C, T/T or C/T astrocytes were co-cultured with OPCs in the absence of cytokine treatment. Mildly reduced population of OPCs in co-cultures with C/C astrocytes was revealed by decreased # of O4<sup>+</sup> cells 6 days after co-culture. Astrocytes in the co-culture were stained for GFAP. The fold change in O4<sup>+</sup> cell # is relative to that in co-cultures with T/T or C/T astrocytes in panel D.

(E-G) C/C astrocytes induce mild reduction of MBP<sup>+</sup> oligodendrocyte # in the absence of cytokine treatment, compared to T/T or C/T astrocytes. The # and area of MBP<sup>+</sup> oligodendrocytes were evaluated by staining for MBP in astrocyte-OPC-nanofiber co-cultures 20 days after co-culture (E). The fold change in MBP<sup>+</sup> cell # or MBP<sup>+</sup> area is relative to that in co-cultures with T/T or C/T astrocytes in (F, G).

Error bars are SEM of the mean. p values are indicated in the graphs or labelled as \*\*\* when  $p < 0.001$ , analyzed by two-tailed student's t-test for (B, D, F, G). 2 isogenic pairs were used, with 2 iPSC lines per group. n=8 independent experiments for (B, D, F, G). Scale bar: 50  $\mu\text{m}$  for (A, C, E).



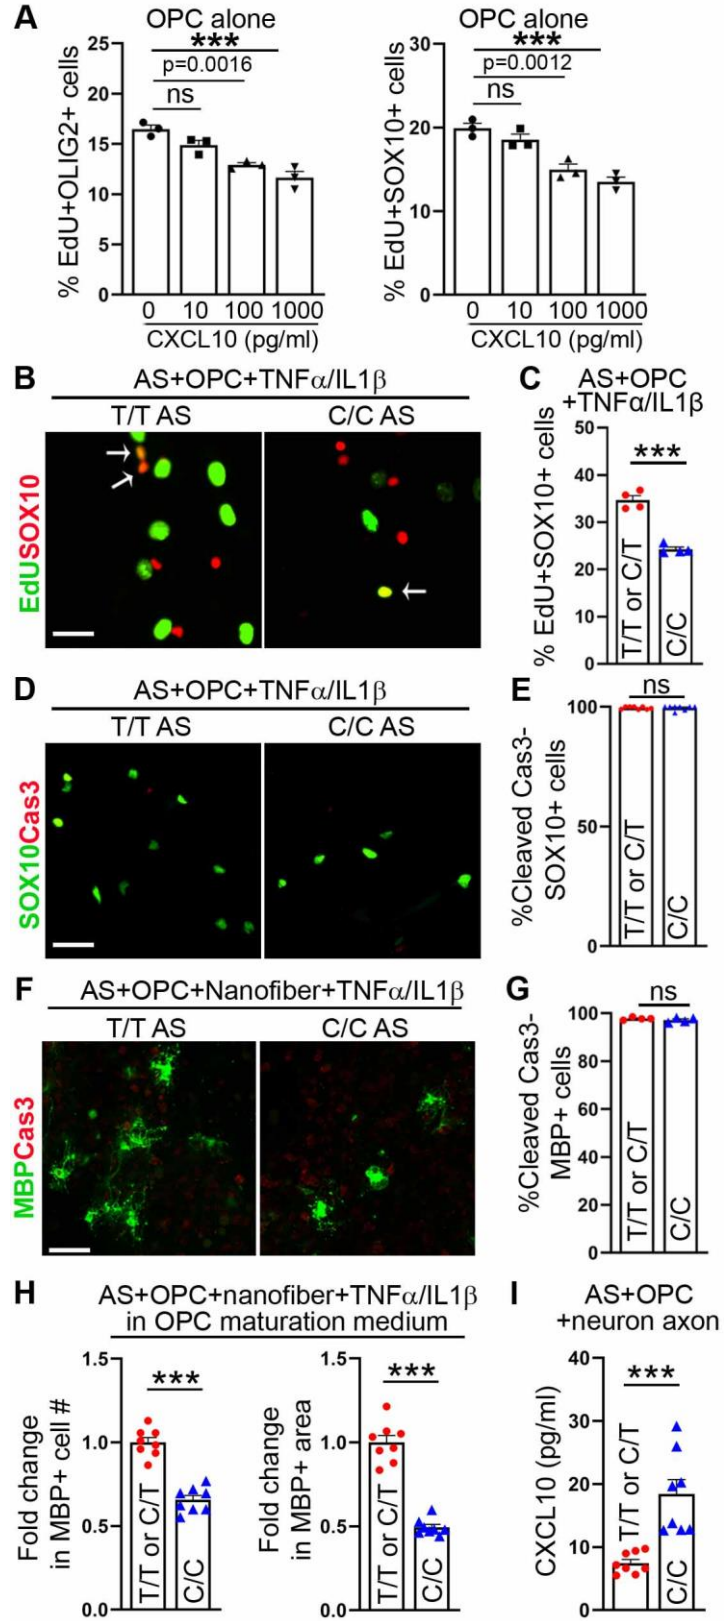



**Fig. S4 C/C astrocytes do not induce more OPC or oligodendrocyte cell death than T/T or C/T astrocytes in astrocyte-OPC co-cultures treated with cytokines, related to Fig 4.**

(A) CXCL10 inhibits OPC proliferation. OPCs were treated with 0, 10, 100 or 1000 pg/ml CXCL10 for 1 day. OPC proliferation rate was indicated as the percentage of EdU<sup>+</sup>OLIG2<sup>+</sup> cells (left) or EdU<sup>+</sup>SOX10<sup>+</sup> cells (right).

(B, C) Cytokine-treated C/C astrocytes inhibit OPC proliferation, compared to T/T or C/T astrocytes. The proliferation of OPC was evaluated by EdU labeling 1 day after co-culture. Arrows point to the EdU<sup>+</sup>SOX10<sup>+</sup> cells that represent proliferative OPCs (B). The percentage of EdU<sup>+</sup>SOX10<sup>+</sup> cells in T/T or C/T and C/C astrocyte-OPC co-cultures treated with TNF $\alpha$ /IL1 $\beta$  is shown in panel C.

(D, E) C/C astrocytes do not include substantial OPC apoptosis in astrocyte-OPC co-cultures treated with TNF $\alpha$ /IL1 $\beta$ . Representative images of cleaved caspase-3 (Cas3) and SOX10 staining of TNF $\alpha$ /IL1 $\beta$ -treated co-cultures containing C/C, T/T or C/T astrocytes (C). The percentage of cleaved Cas3<sup>+</sup>SOX10<sup>+</sup> cells in total SOX10<sup>+</sup> cells is shown in panel D.

(F, G) C/C astrocytes do not induce considerable oligodendrocyte apoptosis in TNF $\alpha$ /IL1 $\beta$ -treated astrocyte-OPC co-cultures on nanofibers. Representative images of cleaved caspase-3 (Cas3) and MBP staining of oligodendrocytes from TNF $\alpha$ /IL1 $\beta$ -treated co-cultures containing C/C, T/T or C/T astrocytes (E). The percentage of cleaved Cas3<sup>+</sup>MBP<sup>+</sup> cells in total MBP<sup>+</sup> cells is shown in panel F.

(H) C/C astrocytes reduce MBP<sup>+</sup> cell # or MBP<sup>+</sup> area in TNF $\alpha$ /IL1 $\beta$ -treated astrocyte-OPC-nanofiber co-cultures maintained in glial maturation medium, compared to T/T or C/T astrocytes. The astrocyte-OPC-nanofiber co-cultures were maintained in glial maturation medium for 20 days and treated with TNF $\alpha$ /IL1 $\beta$ . The fold change in MBP<sup>+</sup> cell # or MBP<sup>+</sup> area is relative to that in co-cultures with T/T or C/T astrocytes.

(I) ELISA detection of CXCL10 protein levels in C/C, T/T or C/T astrocytes co-cultured with OPC and neurons for 20 days.

Error bars are SEM of the mean. p values are indicated in the graphs or labelled as \*\*\* when  $p < 0.001$ , analyzed by one-way ANOVA followed by Tukey's multiple comparison test for (A), two-tailed student's t-test for (C, E, G-I). ns: not statistically significant ( $p > 0.05$ ). 2 isogenic pairs were used, with 2 iPSC lines per group for (C, E, G-I). n=3 independent experiments for (A), n=8 independent experiments for (E, H, I), n=4 independent experiments for (C, G). Scale bar: 50  $\mu$ m for (B, D, F).

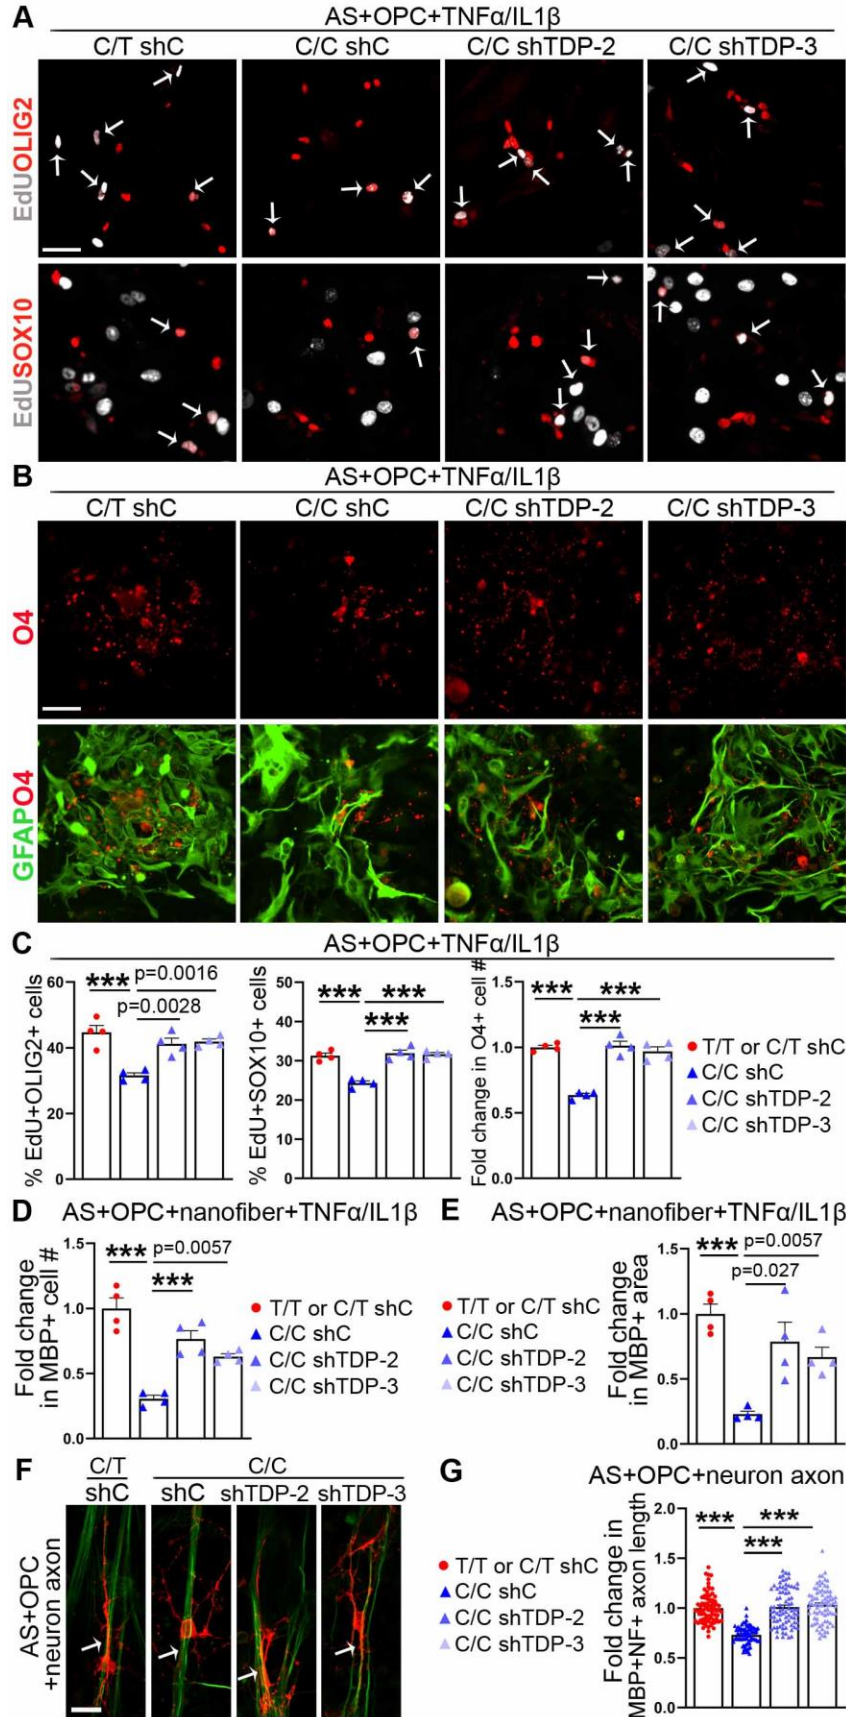

**Fig S5 Knockdown of TDP-43 in C/C astrocytes promotes OPC proliferation and myelination, related to Fig 4, 6.**

(A-C) Knockdown (KD) of TDP-43 in C/C astrocytes treated with TNF $\alpha$ /IL1 $\beta$  promotes OPC proliferation and increases co-cultured OPC cell #. The proliferation of OPC was evaluated by EdU labeling 1 day after co-culture. Arrows point to the EdU<sup>+</sup>OLIG2<sup>+</sup> or EdU<sup>+</sup>SOX10<sup>+</sup> proliferative OPCs (A). The percentage of EdU<sup>+</sup>OLIG2<sup>+</sup> cells (left) or EdU<sup>+</sup>SOX10<sup>+</sup> cells (middle) in OPCs co-cultured with control (shC) T/T or C/T, control C/C, or TDP-43 KD (shTDP-2 or shTDP-3) C/C astrocytes is shown in panel C (left and middle). Increased O4<sup>+</sup> OPC cell # in co-cultures with TNF $\alpha$ /IL1 $\beta$ -treated TDP-43 KD C/C astrocytes, compared to that in co-cultures with TNF $\alpha$ /IL1 $\beta$ -treated control C/C astrocytes, was detected 6 days after co-culture. Astrocytes in the co-cultures were stained for GFAP (B). The fold change of O4<sup>+</sup> cell # is relative to the O4<sup>+</sup> cell # in co-cultures with control T/T or C/T astrocytes in panel C (right).

(D, E) KD of TDP-43 in C/C astrocytes treated with TNF $\alpha$ /IL1 $\beta$  increases the MBP<sup>+</sup> cell # and MBP<sup>+</sup> area in astrocyte-OPC-nanofiber co-cultures. The fold change in MBP<sup>+</sup> cell # (D) or MBP<sup>+</sup> area (E) is relative to that in co-cultures with TNF $\alpha$ /IL1 $\beta$ -treated control T/T or C/T astrocytes in panel E and F.

(F, G) KD of TDP-43 in C/C astrocytes increases MBP<sup>+</sup>NF<sup>+</sup> axon length in astrocyte-neuron-OPC co-cultures. Astrocyte-neuron-OPC co-cultures were stained for MBP and NF to measure MBP<sup>+</sup>NF<sup>+</sup> axon length 20 days after co-culture. Examples of the MBP<sup>+</sup>NF<sup>+</sup> axons are pointed by arrows (F). The fold change in MBP<sup>+</sup>NF<sup>+</sup> axon length is relative to that in co-cultures with control T/T or C/T astrocytes in panel G.

Error bars are SEM of the mean. p values are indicated in the graphs or labelled as \*\*\* when p < 0.001, analyzed by one-way ANOVA followed by Tukey's multiple comparison test. 2 isogenic pairs were used, with 2 iPSC lines per group. n=4 independent experiments for (C-E), n=80 MBP<sup>+</sup> cells from 4 independent experiments for (G). Scale bar: 50  $\mu$ m for (A, B), 20  $\mu$ m for (F).

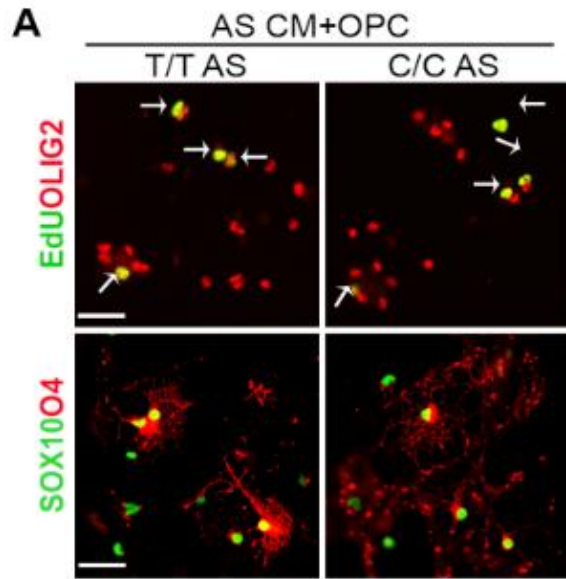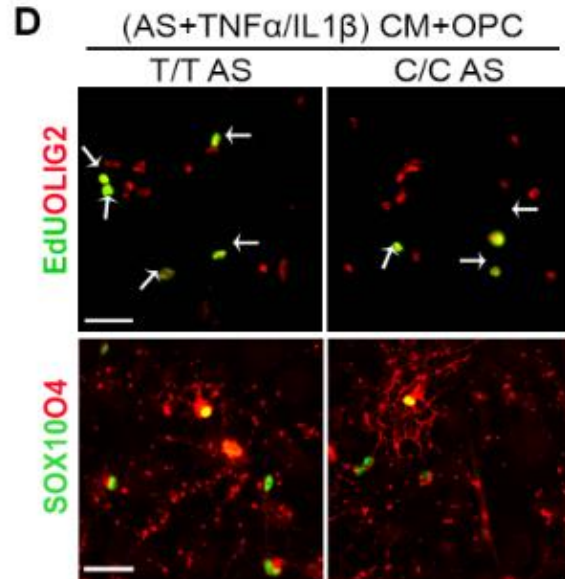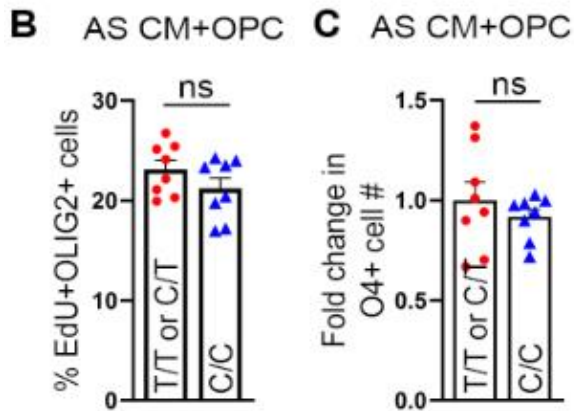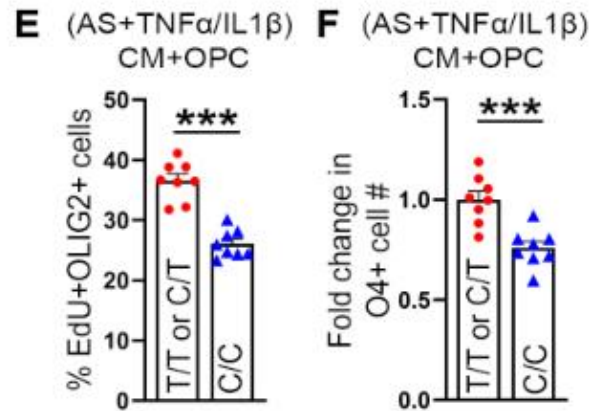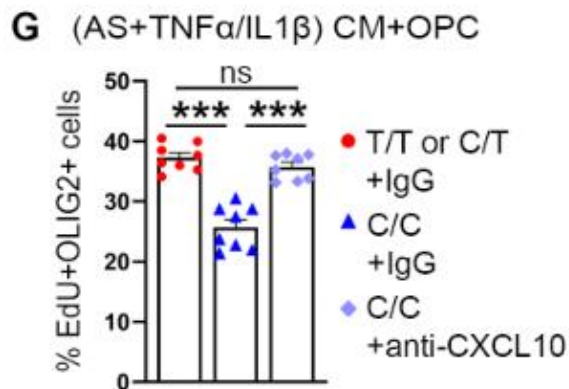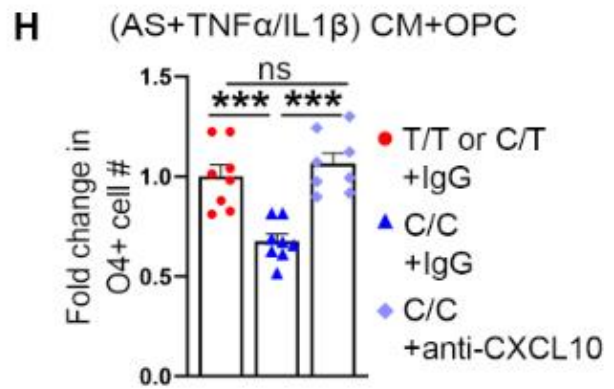

**Fig. S6 Conditioned medium from cytokine-treated C/C astrocytes inhibits OPC proliferation, related to Fig 5, 6.**

(A-C) Conditioned medium (CM) collected from C/C astrocytes without cytokine treatment has no effect on OPC proliferation and cell number, compared to CM from T/T or C/T astrocytes. CM collected from C/C, T/T or C/T astrocytes without cytokine treatment was used to treat OPCs. OPC proliferation was evaluated by EdU labeling 1 day after CM treatment. Arrows point to the EdU<sup>+</sup>OLIG2<sup>+</sup> proliferative OPCs (panel A, upper). The percentage of EdU<sup>+</sup>OLIG2<sup>+</sup> cells in OPCs treated with CM from C/C, T/T or C/T astrocytes is shown in panel B. The fold change in O4<sup>+</sup> cell #, relative to that in OPCs treated with CM from T/T or C/T astrocytes, is shown in panel C.

(D-F) CM collected from cytokine-treated C/C astrocytes inhibit OPC proliferation and cell number. The proliferation of OPC was evaluated by EdU labeling 1 day after CM treatment. Arrows point to the EdU<sup>+</sup>OLIG2<sup>+</sup> cells that represent proliferative OPCs (panel D, upper). The percentage of EdU<sup>+</sup>OLIG2<sup>+</sup> cells in OPCs treated with CM from TNF $\alpha$ /IL1 $\beta$ -treated C/C, T/T or C/T astrocytes is shown in panel E. The fold change in O4<sup>+</sup> cell #, relative to that in OPCs treated with CM from TNF $\alpha$ /IL1 $\beta$ -treated T/T or C/T astrocytes, is shown in panel F.

(G) The percentage of EdU<sup>+</sup>OLIG2<sup>+</sup> cells in OPCs treated with CM collected from C/C astrocytes treated with cytokine together with IgG or the anti-CXCL10 neutralizing antibody. CM from T/T or C/T astrocytes treated with cytokine together with IgG was included as a control.

(H) The fold change in O4<sup>+</sup> cell # in OPCs treated with CM collected from C/C astrocytes treated with cytokine together with IgG or the anti-CXCL10 neutralizing antibody. The fold change in O4<sup>+</sup> cell # is relative to that in OPCs treated with CM from T/T or C/T astrocytes treated with cytokine together with IgG.

Error bars are SEM of the mean. \*\*\* $p < 0.001$  by two-tailed student's t-test for (B, C, E, F) and one-way ANOVA followed by Tukey's multiple comparison test for (G, H). ns: not statistically significant ( $p > 0.05$ ). 2 isogenic pairs were used, with 2 iPSC lines per group.  $n=8$  independent experiments for (B, C, E-H). Scale bar: 50  $\mu\text{m}$  for (A, D).

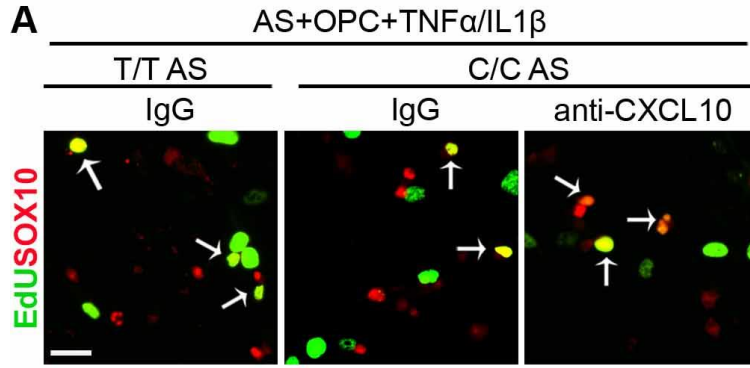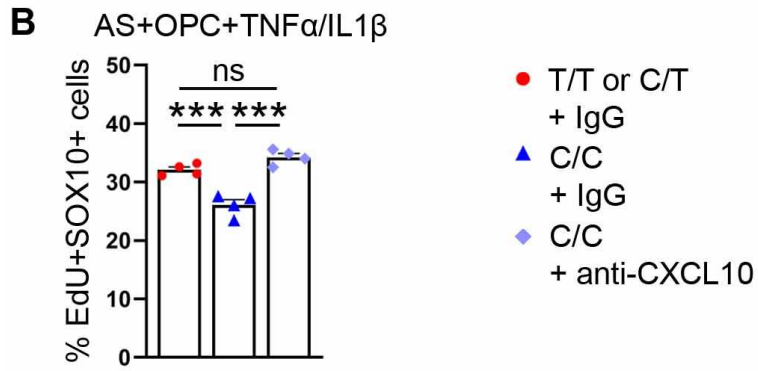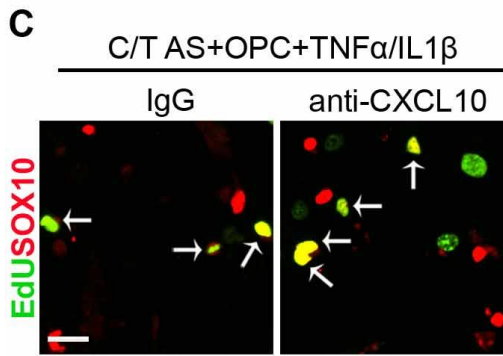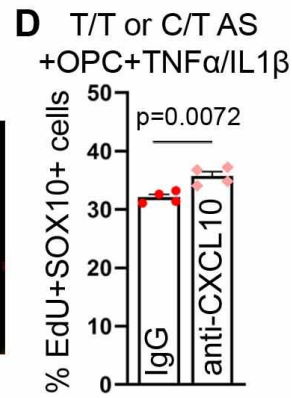

**Fig. S7 A CXCL10 neutralizing antibody increases OPC proliferation in astrocyte-OPC co-cultures, related to Fig 6.**

(A) Treatment with the CXCL10 neutralizing antibody rescued OPC proliferation in astrocyte-OPC co-cultures with C/C astrocytes treated with TNF $\alpha$ /IL1 $\beta$ . Representative images of EdU and SOX10 double staining after 1-day co-culture in C/C astrocyte-OPC co-cultures treated with IgG plus TNF $\alpha$ /IL1 $\beta$  or anti-CXCL10 antibody plus TNF $\alpha$ /IL1 $\beta$ . T/T or C/T astrocyte-OPC co-cultures treated with IgG plus TNF $\alpha$ /IL1 $\beta$  were included as a control.

(B) The percentage of EdU<sup>+</sup>SOX10<sup>+</sup> cells in C/C astrocyte-OPC co-cultures treated with IgG plus TNF $\alpha$ /IL1 $\beta$  or anti-CXCL10 plus TNF $\alpha$ /IL1 $\beta$ . T/T or C/T astrocyte-OPC co-cultures treated with IgG plus TNF $\alpha$ /IL1 $\beta$  were included as a control.

(C) Treatment with the CXCL10 neutralizing antibody increased OPC proliferation in astrocyte-OPC co-cultures with T/T or C/T astrocytes treated with TNF $\alpha$ /IL1 $\beta$ . Representative images of EdU and SOX10 double staining after 1-day co-culture in T/T or C/T astrocyte-OPC co-cultures treated with IgG plus TNF $\alpha$ /IL1 $\beta$  or anti-CXCL10 antibody plus TNF $\alpha$ /IL1 $\beta$ .

(D) The percentage of EdU<sup>+</sup>SOX10<sup>+</sup> cells in T/T or C/T astrocyte-OPC co-cultures treated with IgG plus TNF $\alpha$ /IL1 $\beta$  or anti-CXCL10 plus TNF $\alpha$ /IL1 $\beta$ .

Error bars are SEM of the mean. p values are indicated in the graphs or labelled as \*\*\* when  $p < 0.001$ , analyzed by one-way ANOVA followed by Tu'ey's multiple comparison test for (B), two-tailed student's t-test for (D). ns: not statistically significant ( $p > 0.05$ ). 2 isogenic pairs were used, with 2 iPSC lines per group. n=4 independent experiments.



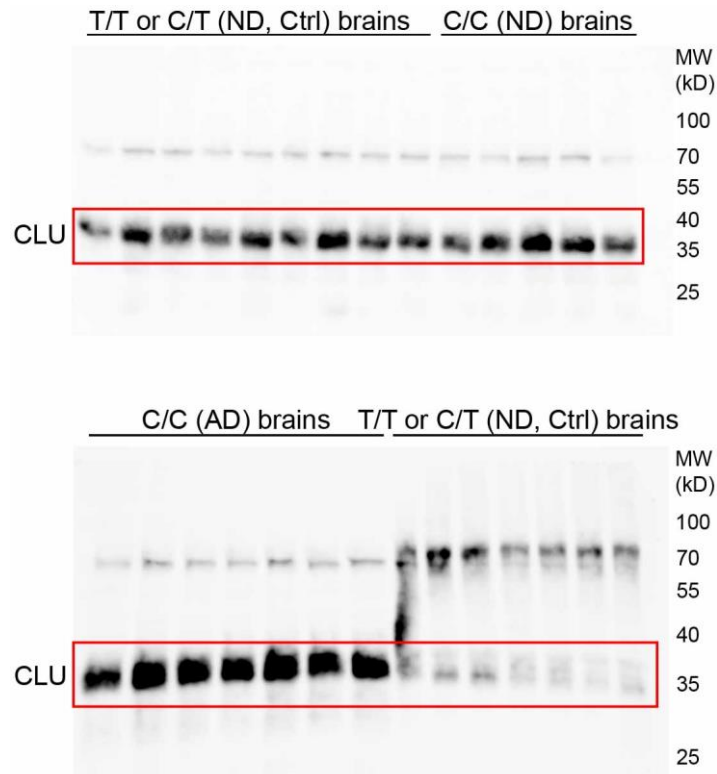

**Fig. S8 Elevated CLU protein level in C/C vs T/T or C/T brains, related to Fig 7.**

Uncropped images for Western blot of CLU in T/T or C/T ND brain, C/C ND brain, and C/C AD brain tissues. The T/T or C/T ND brain tissues were included as controls for C/C ND brain tissues in blot 1 and for C/C AD brain tissues in blot 2.

## Supplementary Tables

**Supplementary Table 1** List of human iPSCs and astrocytes used in the study, related to Fig 1, 2.

| iPSC lines     | Astrocyte lines | ND, AD, or CRISPR | Gender | Age | ApoE genotype | Karyotype | Source      | CLU rs11136000 |
|----------------|-----------------|-------------------|--------|-----|---------------|-----------|-------------|----------------|
| iPSC1-C/T      | AS1-C/T         | AD                | Female | 70  | E3/3          | Normal    | UCI         | C/T            |
| iPSC1-C/C      | AS1-C/C         | CRISPR            | Female | 70  | E3/3          | Normal    | This paper  | C/C            |
| iPSC2-C/C      | AS2-C/C         | AD                | Female | 60  | E3/3          | Normal    | Wang et al. | C/C            |
| iPSC2-T/T      | AS2-T/T         | CRISPR            | Female | 60  | E3/3          | Normal    | This paper  | T/T            |
| iPSC3-C/C      | AS3-C/C         | ND                | Male   | 71  | E3/3          | Normal    | Wang et al. | C/C            |
| iPSC3-C/T      | AS3-C/T         | CRISPR            | Male   | 71  | E3/3          | Normal    | This paper  | C/T            |
| iPSC3-T/T      | AS3-T/T         | CRISPR            | Male   | 71  | E3/3          | Normal*   | This paper  | T/T            |
| iPSC lines     | Astrocyte lines | ND, AD, or CRISPR | Gender | Age | ApoE genotype | Karyotype | Source      | CLU SNPs       |
| iPSC3-C/C (WT) | AS3-C/C (WT)    | ND                | Male   | 71  | E3/3          | Normal    | Wang et al. | WT             |
| SNP1 KO-C1     | SNP1 KO-C1      | CRISPR            | Male   | 71  | E3/3          | Normal    | This paper  | SNP1 KO        |
| SNP1 KO-C2     | SNP1 KO-C2      | CRISPR            | Male   | 71  | E3/3          | Normal    | This paper  | SNP1 KO        |
| SNP2 KO-C1     | SNP2 KO-C1      | CRISPR            | Male   | 71  | E3/3          | Normal    | This paper  | SNP2 KO        |
| SNP2 KO-C2     | SNP2 KO-C2      | CRISPR            | Male   | 71  | E3/3          | Normal    | This paper  | SNP2 KO        |
| SNP3 KO-C1     | SNP3 KO-C1      | CRISPR            | Male   | 71  | E3/3          | Normal    | This paper  | SNP3 KO        |
| SNP3 KO-C2     | SNP3 KO-C2      | CRISPR            | Male   | 71  | E3/3          | Normal    | This paper  | SNP3 KO        |
| SNP4 KO-C1     | SNP4 KO-C1      | CRISPR            | Male   | 71  | E3/3          | Normal    | This paper  | SNP4 KO        |
| SNP4 KO-C2     | SNP4 KO-C2      | CRISPR            | Male   | 71  | E3/3          | Normal    | This paper  | SNP4 KO        |

|            |            |        |      |    |      |        |            |         |
|------------|------------|--------|------|----|------|--------|------------|---------|
| SNP5 KO-C1 | SNP5 KO-C1 | CRISPR | Male | 71 | E3/3 | Normal | This paper | SNP5 KO |
| SNP5 KO-C2 | SNP5 KO-C2 | CRISPR | Male | 71 | E3/3 | Normal | This paper | SNP5 KO |

\* Normal male karyotype with minor clone missing Y chromosome.

**Supplementary Table 2** The karyotype of SNP KO iPSCs, related to Table S1.

| iPSC lines | SNP1 KO-C1  | SNP1 KO-C1 | SNP1 KO-C2  | SNP1 KO-C2 | SNP2 KO-C1  | SNP2 KO-C1 | SNP2 KO-C2  | SNP2 KO-C2 | SNP3 KO-C1  | SNP3 KO-C1 |
|------------|-------------|------------|-------------|------------|-------------|------------|-------------|------------|-------------|------------|
| Genes      | Copy Number | p-Value    | Copy Number | p-Value    | Copy Number | p-Value    | Copy Number | p-Value    | Copy Number | p-Value    |
| chr1q      | 1.93        | 0.977      | 1.76        | 0.994      | 1.95        | 0.994      | 2.01        | 1.000      | 2.05        | 0.997      |
| chr4p      | 2.04        | 0.583      | 1.93        | 0.350      | 2.03        | 0.961      | 2.05        | 0.991      | 2.03        | 0.999      |
| chr8q      | 1.91        | 0.993      | 1.91        | 0.977      | 1.9         | 0.997      | 2.06        | 0.998      | 1.86        | 0.824      |
| chr10p     | 1.81        | 0.998      | 1.69        | 0.881      | 1.78        | 0.989      | 2.12        | 0.364      | 1.98        | 0.928      |
| chr12p     | 1.78        | 0.997      | 1.7         | 0.995      | 1.78        | 0.956      | 2.18        | 0.318      | 1.92        | 0.996      |
| chr17q     | 1.84        | 0.998      | 1.71        | 0.980      | 2.25        | 0.530      | 1.97        | 0.998      | 1.98        | 0.995      |
| chr18q     | 1.74        | 0.936      | 2.12        | 0.491      | 2.02        | 0.975      | 1.96        | 0.979      | 2.12        | 0.992      |
| chr20q     | 1.81        | 0.999      | 1.9         | 0.925      | 1.98        | 0.995      | 1.95        | 0.999      | 2.2         | 0.913      |
| chrXp      | 1.75        | 0.968      | 1.8         | 0.997      | 2.03        | 0.996      | 2.01        | 0.999      | 2.03        | 0.998      |
| iPSC lines | SNP3 KO-C2  | SNP3 KO-C2 | SNP4 KO-C1  | SNP4 KO-C1 | SNP4 KO-C2  | SNP4 KO-C2 | SNP5 KO-C1  | SNP5 KO-C1 | SNP5 KO-C2  | SNP5 KO-C2 |
| Genes      | Copy Number | p-Value    | Copy Number | p-Value    | Copy Number | p-Value    | Copy Number | p-Value    | Copy Number | p-Value    |
| chr1q      | 2.13        | 0.943      | 2.08        | 0.754      | 1.96        | 0.984      | 2.07        | 0.907      | 1.98        | 1.000      |
| chr4p      | 2.15        | 0.990      | 2.03        | 0.692      | 2.01        | 0.637      | 2.06        | 0.889      | 2.1         | 0.992      |
| chr8q      | 1.94        | 0.747      | 1.9         | 0.914      | 1.97        | 0.977      | 1.98        | 0.976      | 2.03        | 0.998      |
| chr10p     | 2.09        | 0.998      | 1.86        | 0.821      | 1.76        | 0.938      | 2.05        | 0.908      | 2.04        | 0.961      |
| chr12p     | 1.99        | 0.879      | 1.76        | 0.133      | 1.87        | 0.998      | 2           | 0.929      | 1.94        | 0.995      |
| chr17q     | 1.88        | 0.087      | 1.89        | 0.915      | 2.14        | 0.041      | 2.12        | 0.721      | 2.18        | 0.970      |
| chr18q     | 2.03        | 0.995      | 1.95        | 0.857      | 1.86        | 0.984      | 1.95        | 0.896      | 1.9         | 0.998      |
| chr20q     | 2.12        | 0.997      | 1.94        | 0.932      | 1.9         | 0.998      | 1.93        | 0.798      | 1.97        | 0.999      |
| chrXp      | 2.01        | 0.998      | 2.02        | 0.917      | 1.86        | 0.998      | 1.99        | 0.994      | 2.05        | 0.623      |

**Supplementary Table 4** List of nuclear proteins exhibited different binding between C and T alleles detected by mass spectrometry, related to Fig 3.

| Protein | Sequence coverage |      |      |      | Intensity |          |    |    | p-value  |
|---------|-------------------|------|------|------|-----------|----------|----|----|----------|
|         | C1                | C2   | T1   | T2   | C1        | C2       | T1 | T2 |          |
| TDP43   | 16.4              | 16.4 | 0    | 0    | 69817000  | 65503000 | 0  | 0  | 0.001015 |
| GAL7    | 19.9              | 19.9 | 0    | 0    | 61764000  | 61395000 | 0  | 0  | 8.98E-06 |
| PCBP2   | 12.7              | 22.8 | 12.7 | 12.7 | 9715200   | 35263000 | 0  | 0  | 0.22038  |

|        |      |      |      |      |          |          |          |           |          |
|--------|------|------|------|------|----------|----------|----------|-----------|----------|
| DDX3X  | 4.6  | 6.5  | 1.6  | 1.6  | 15548000 | 54380000 | 0        | 0         | 0.213536 |
| HP1BP3 | 2    | 4    | 2    | 2    | 0        | 14895000 | 0        | 0         | 0.42265  |
| TAF15  | 4.6  | 6.9  | 2.4  | 0    | 2376400  | 2537700  | 0        | 0         | 0.001076 |
| DESMIN | 10.2 | 7.2  | 7.2  | 10   | 0        | 0        | 0        | 435170000 | 0.42265  |
| GSN    | 30.8 | 30.8 | 25.8 | 25.8 | 0        | 0        | 16035000 | 16118000  | 6.66E-06 |

**Supplementary Table 5** List of human brain tissues used in the study, related to Fig 7.

| Human brain tissues | CLU rs1113600 | ApoE genotype | Gender | Age | AD status |
|---------------------|---------------|---------------|--------|-----|-----------|
| S1                  | T/T           | E3/3          | Male   | 61  | No        |
| S2                  | T/T           | E3/3          | Male   | 76  | No        |
| S3                  | T/T           | E3/3          | Male   | 80  | No        |
| S4                  | T/T           | E3/3          | Male   | 91  | No        |
| S5                  | C/T           | E3/3          | Female | 59  | No        |
| S6                  | C/T           | E3/3          | Male   | 82  | No        |
| S7                  | C/T           | E3/3          | Female | 82  | No        |
| S8                  | C/T           | E3/3          | Female | 90  | No        |
| S9                  | C/T           | E3/3          | Female | 95  | No        |
| S10                 | C/C           | E3/3          | Female | 75  | No        |
| S11                 | C/C           | E3/3          | Female | 76  | No        |
| S12                 | C/C           | E3/3          | Male   | 89  | No        |
| S13                 | C/C           | E3/3          | Male   | 63  | No        |
| S14                 | C/C           | E3/3          | Male   | 79  | No        |
| S15                 | C/C           | E3/3          | Male   | 86  | No        |
| S16                 | C/C           | E3/3          | Male   | 90  | No        |
| S17                 | C/C           | E3/3          | Female | 87  | Yes       |
| S18                 | C/C           | E3/3          | Male   | 87  | Yes       |
| S19                 | C/C           | E3/3          | Female | 86  | Yes       |
| S20                 | C/C           | E3/3          | Female | 87  | Yes       |
| S21                 | C/C           | E3/3          | Female | ≥90 | Yes       |
| S22                 | C/C           | E3/3          | Male   | 85  | Yes       |
| S23                 | C/C           | E3/3          | Female | ≥90 | Yes       |
| S24                 | C/C           | E3/3          | Male   | ≥90 | Yes       |
| S25                 | C/C           | E3/3          | Female | 86  | Yes       |

**Supplementary Table 6** Oligonucleotide sequences for gene editing and PCR, related to STAR Methods.

| Oligonucleotide Name | Oligonucleotide Sequence | CLU isoforms |
|----------------------|--------------------------|--------------|
|----------------------|--------------------------|--------------|

|                         |                                                                                                                                                 |          |
|-------------------------|-------------------------------------------------------------------------------------------------------------------------------------------------|----------|
| CLU SNP1 KO sgRNA 1     | 5'-UCUCUUUUU AAGCAUCUGGGU-3'                                                                                                                    | N/A      |
| CLU SNP1 KO sgRNA 2     | 5'-UGAGAGGGUAGUCAUUGAGU-3'                                                                                                                      | N/A      |
| CLU SNP2 KO sgRNA 1     | 5'-ACAGAACCAACAGGACGAUG-3'                                                                                                                      | 217      |
| CLU SNP2 KO sgRNA 2     | 5'-UCUCCCACUAGGGAUGCAGA-3'                                                                                                                      | 202, 215 |
| CLU SNP3 KO sgRNA 1     | 5'-UUCUACCCUACUCUGACCAA-3'                                                                                                                      | 211      |
| CLU SNP3 KO sgRNA 2     | 5'-AGGGAAGAGCUGAAACACUG-3'                                                                                                                      | 211      |
| CLU SNP4 KO sgRNA 1     | 5'-CCUUGACCAUCCCACUGGAG-3'                                                                                                                      | 203      |
| CLU SNP4 KO sgRNA 2     | 5'-AUCACAUGCAGUUC CAAGC-3'                                                                                                                      | 203      |
| CLU SNP5 KO sgRNA 1     | 5'-CCUCUGACCUCAUCACCCUG-3'                                                                                                                      | N/A      |
| CLU SNP5 KO sgRNA 2     | 5'-UAAAAACCCAGAU CAGACAU-3'                                                                                                                     | N/A      |
| rs11136000 C to T sgRNA | 5'-CGUUAGAGAGUUUUGAUAGC-3'                                                                                                                      | N/A      |
| rs11136000 T to C sgRNA | 5'-CGUUAGAGAAUUUUGAUAGC-3'                                                                                                                      | N/A      |
| rs11136000 C to T ssODN | 5'-TCCTGGCGTGCAAAGGGAATGGCAG<br>GCATTCAGCACCAAAGCCACACCAGCT<br>ATCAAAATTCTCTAACGGGCCCTTGCCA<br>CTTGACCCAATAATTCTGTAAGAATCTG<br>TCTCAGGCCAGG-3'  | N/A      |
| rs11136000 T to C ssODN | 5'-TCCTGGCGTGCAAAGGGAATGGCAG<br>GCATTCAGCACCAAAGCCACACCAGCT<br>ATCAA AACTCTCTAACGGGCCCTTGCC<br>ACTTGACCCAATAATTCTGTAAGAATCT<br>GTCTCAGGCCAGG-3' | N/A      |
| CLU-SNP1-Forward        | 5'-TGTCAGGGGATTCTTTGAGATA-3'                                                                                                                    | N/A      |
| CLU-SNP1-Reverse        | 5'-ATGCAGGTCTGTTTCAGGCA-3'                                                                                                                      | N/A      |
| CLU-SNP2-Forward        | 5'-CTGGCTTTGTCTCTCTGGCAT-3'                                                                                                                     | N/A      |
| CLU-SNP2-Reverse        | 5'-TCCTCTGCAATGTGCACCTA-3'                                                                                                                      | N/A      |
| CLU-SNP3-Forward        | 5'-ATTGCCTGAGCCCTGAAGT-3'                                                                                                                       | N/A      |
| CLU-SNP3-Reverse        | 5'-GTGCTTTTTGCGGTATTCTGCAG-3'                                                                                                                   | N/A      |

|                  |                              |     |
|------------------|------------------------------|-----|
| CLU-SNP4-Forward | 5'-CCTTGACAGCCCCTGAACTG-3'   | N/A |
| CLU-SNP4-Reverse | 5'-GAAGTAGGGCGACCGTGAGA-3'   | N/A |
| CLU-SNP5-Forward | 5'-CCAGAATTGGAGGCATGATG-3'   | N/A |
| CLU-SNP5-Reverse | 5'-GGAGGAGTATGTTCTGGAGGTC-3' | N/A |

\*N/A means that the oligonucleotide is not located on any isoforms.

**Supplementary Table 7:** Oligonucleotide sequences for qPCR, related to STAR Methods.

| Primer Name     | Primer Sequence               | CLU isoform coverage                                            |
|-----------------|-------------------------------|-----------------------------------------------------------------|
| hCLU-1-Forward  | 5'-GAGCGCAAGACACTGCTCA-3'     | 201, 202, 205, 206, 207, 211, 212, 215, 216, 217                |
| hCLU-1-Reverse  | 5'-TTCCCTGGTCTCATTAGGGC-3'    | 201, 202, 205, 206, 207, 211, 212, 215, 216, 217                |
| hCLU-2-Forward  | 5'-TGTCTTGCCTCTTCGTTTG-3'     | 201, 202, 203, 204, 205, 206, 207, 211, 212, 214, 215, 216, 217 |
| hCLU-2-Reverse  | 5'-ACCAGACGGTCTCAGACAATG-3'   | 201, 202, 203, 204, 205, 206, 207, 211, 212, 214, 215, 216, 217 |
| hCLU-3-Forward  | 5'-TCTTTCCCAAGTCCCGCATC-3'    | 201, 202, 209, 211, 213, 215, 217                               |
| hCLU-3-Reverse  | 5'-CACACAGTCCGGTCATCGTC-3'    | 201, 202, 209, 211, 213, 215, 217                               |
| hCLU-4-Forward  | 5'-TCAGTGACACCGGAAGGAAC-3'    | 201, 202, 208, 209, 215                                         |
| hCLU-4-Reverse  | 5'-ACAACCCCTCCAGGCTAA-3'      | 201, 202, 208, 209, 215                                         |
| hGAPDH-Forward  | 5'-CCTGTTCGACAGTCAGCCG-3'     | N/A                                                             |
| hGAPDH-Reverse  | 5'-CGACCAAATCCGTTGACTCC-3'    | N/A                                                             |
| hMBP-Forward    | 5'-AAGGCCAGAGACCAGGATTT-3'    | N/A                                                             |
| hMBP-Reverse    | 5'-TCCCTTGAATCCCTTGTGAG-3'    | N/A                                                             |
| hCCDC25-Forward | 5'-AGACCAAAGTCGAGCGGTTC-3'    | N/A                                                             |
| hCCDC25-Reverse | 5'-ATTGCCATCCTGATTTGAAGACA-3' | N/A                                                             |

|                 |                               |     |
|-----------------|-------------------------------|-----|
| hCHRNA2-Forward | 5'-ACCACCAACGTCTGGCTAAA-3'    | N/A |
| hCHRNA2-Reverse | 5'-CTCCCCATCTGCATTGTTGT-3'    | N/A |
| hEPHX2-Forward  | 5'-ACTCCCTTCATACCAGCAAATC-3'  | N/A |
| hEPHX2-Reverse  | 5'-GACTCAGGTTCTGTTCCAGTTC-3'  | N/A |
| hESCO2-Forward  | 5'-TCTCCTAAGTCCACTGTCTATCC-3' | N/A |
| hESCO2-Reverse  | 5'-GAAGTTGACAGATCCCACAGAA-3'  | N/A |
| hPBK-Forward    | 5'-TTGAAAGCCAGGAGGGTTCG-3'    | N/A |
| hPBK-Reverse    | 5'-CTCAGTCCAGAGTCTCACCGC-3'   | N/A |
| hPTK2B-Forward  | 5'-GGGAGGTCTATGAAGGTGTCTA-3'  | N/A |
| hPTK2B-Reverse  | 5'-CTTCTCCTTGTTGTCCAGAGTG-3'  | N/A |
| hSCARA3-Forward | 5'-CATCTCCTTGACCCAGTCTATTT-3' | N/A |
| hSCARA3-Reverse | 5'-TGGCAGAAAGAGCAGTTGT-3'     | N/A |
| hSCARA5-Forward | 5'-CGATTCGGGCAAGGCACT-3'      | N/A |
| hSCARA5-Reverse | 5'-CGGCATGTCCACAGTTTGTC-3'    | N/A |
| hTRIM35-Forward | 5'-CTCCCGTGTCTTCTCACAGG-3'    | N/A |
| hTRIM35-Reverse | 5'-CGAGCGTGTGTCGTGGTAG-3'     | N/A |
| hCXCL10-Forward | 5'-CCTGCAAGCCAATTTGTCCA-3'    | N/A |
| hCXCL10-Reverse | 5'-TGATGGCCTTCGATTCTGGAT-3'   | N/A |
| hCXCL1-Forward  | 5'-CTCAATCCTGCATCCCCATA-3'    | N/A |
| hCXCL1-Reverse  | 5'-TGTTCTATAAAGGGCAGGGC-3'    | N/A |
| hG-CSF-Forward  | 5'-TCCAGGAGAAGCTGGTGAGTGA-3'  | N/A |
| hG-CSF-Reverse  | 5'-CGCTATGGAGTTGGCTCAAGCA-3'  | N/A |
| hGM-CSF-Forward | 5'-GCGTCTCCTGAACCTGAGTAG-3'   | N/A |
| hGM-CSF-Reverse | 5'-TCGGCTCCTGGAGGTCAA-3'      | N/A |



|                       |                            |     |
|-----------------------|----------------------------|-----|
| hCCL5-Forward         | 5'-GGCAGCCCTCGCTGTCATCC-3' | N/A |
| hCCL5-Reverse         | 5'-GCAGCAGGGTGTGGTGTCCG-3' | N/A |
| hIL1 $\beta$ -Forward | 5'-GCAGGCCGCGTCAGTTGTTG-3' | N/A |
| hIL1 $\beta$ -Reverse | 5'-CCCGGAGCGTGCAGTTCAGT-3' | N/A |
